# Supplementary material for: Impact of age on efficacy of postoperative oxaliplatin-based chemotherapy in patients with rectal cancer after neoadjuvant chemoradiotherapy
Source: PubMed Central journal article supplement (PMC4991408; doi:10.18632/oncotarget.7544), 2016-02-21
Supplement: oncotarget-07-19643-s001.pdf [file oncotarget-07-19643-s001.pdf]

# Impact of age on efficacy of postoperative oxaliplatin-based chemotherapy in patients with rectal cancer after neoadjuvant chemoradiotherapy

## Supplementary Materials

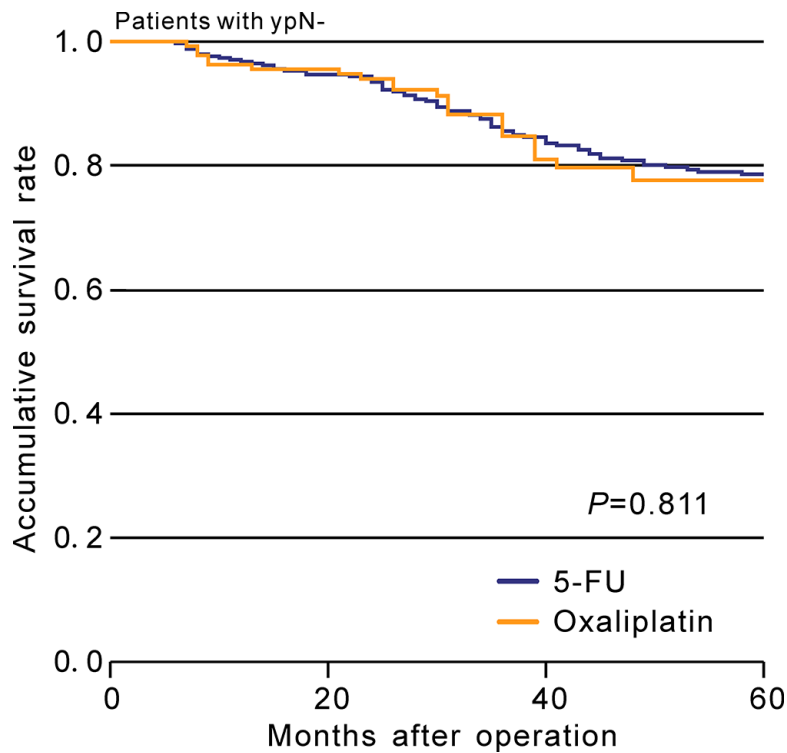

Supplementary Figure S1: Kaplan-meier comparison of overall survival among ypN- patients who received different postoperative treatment.

**Supplementary Table S1: The difference of incidence of chemotherapy-related adverse events ( $\Delta\%$ ) between oxaliplatin group and 5-FU group**

|                                                         | Total   |             | yPN+    |             | yPN-    |             |
|---------------------------------------------------------|---------|-------------|---------|-------------|---------|-------------|
| <b>Number of patients</b>                               |         |             |         |             |         |             |
| Total                                                   | 763     |             | 290     |             | 473     |             |
| Aged < 73                                               | 381     |             | 144     |             | 237     |             |
| Aged $\geq$ 73                                          | 382     |             | 146     |             | 236     |             |
| <b>Adverse event(<math>\Delta\%</math>)<sup>a</sup></b> |         |             |         |             |         |             |
| <b>Acute renal failure</b>                              |         |             |         |             |         |             |
| Total                                                   | 1.336%  | $P = 0.364$ | 2.135%  | $P = 0.400$ | 0.781%  | $P = 0.662$ |
| Aged < 73                                               | -1.296% | $P = 0.428$ | 0.585%  | $P = 0.854$ | -2.548% | $P = 0.150$ |
| Aged $\geq$ 73                                          | 5.355%  | $P = 0.035$ | 4.438%  | $P = 0.275$ | 5.963%  | $P = 0.068$ |
| <b>Infection</b>                                        |         |             |         |             |         |             |
| Total                                                   | 0.742%  | $P = 0.731$ | 1.766%  | $P = 0.543$ | 0.262%  | $P = 0.930$ |
| Aged < 73                                               | 0.392%  | $P = 0.883$ | -0.753% | $P = 0.858$ | 1.131%  | $P = 0.743$ |
| Aged $\geq$ 73                                          | 2.054%  | $P = 0.558$ | 4.438%  | $P = 0.275$ | 0.875%  | $P = 0.863$ |
| <b>Neutropenia</b>                                      |         |             |         |             |         |             |
| Total                                                   | 21.526% | $P < 0.001$ | 26.871% | $P < 0.001$ | 18.016% | $P < 0.001$ |
| Aged < 73                                               | 26.104% | $P < 0.001$ | 32.191% | $P < 0.001$ | 22.333% | $P < 0.001$ |
| Aged $\geq$ 73                                          | 15.653% | $P < 0.001$ | 21.423% | $P = 0.002$ | 11.579% | $P = 0.019$ |
| <b>Nausea or vomiting</b>                               |         |             |         |             |         |             |
| Total                                                   | 16.712% | $P < 0.001$ | 16.278% | $P = 0.001$ | 17.028% | $P < 0.001$ |
| Aged < 73                                               | 17.096% | $P < 0.001$ | 20.485% | $P = 0.004$ | 14.785% | $P = 0.004$ |
| Aged $\geq$ 73                                          | 16.680% | $P < 0.001$ | 9.695%  | $P = 0.146$ | 21.652% | $P = 0.001$ |
| <b>Dehydration</b>                                      |         |             |         |             |         |             |
| Total                                                   | 8.200%  | $P = 0.002$ | 14.143% | $P = 0.001$ | 4.306%  | $P = 0.192$ |
| Aged < 73                                               | 7.430%  | $P = 0.033$ | 13.294% | $P = 0.030$ | 3.583%  | $P = 0.387$ |
| Aged $\geq$ 73                                          | 9.883%  | $P = 0.016$ | 15.150% | $P = 0.018$ | 6.431%  | $P = 0.225$ |
| <b>Diarrhea</b>                                         |         |             |         |             |         |             |
| Total                                                   | 0.869%  | $P = 0.712$ | 4.030%  | $P = 0.306$ | -1.231% | $P = 0.675$ |
| Aged < 73                                               | -0.593% | $P = 0.856$ | 5.602%  | $P = 0.317$ | -4.578% | $P = 0.251$ |
| Aged $\geq$ 73                                          | 2.398%  | $P = 0.489$ | 1.636%  | $P = 0.770$ | 2.869%  | $P = 0.515$ |
| <b>Fever</b>                                            |         |             |         |             |         |             |
| Total                                                   | 2.681%  | $P = 0.083$ | 5.875%  | $P = 0.016$ | 0.643%  | $P = 0.748$ |
| Aged < 73                                               | 5.568%  | $P = 0.008$ | 7.441%  | $P = 0.046$ | 4.339%  | $P = 0.080$ |
| Aged $\geq$ 73                                          | -0.827% | $P = 0.723$ | 3.571%  | $P = 0.250$ | -3.643% | $P = 0.265$ |
| <b>Anemia</b>                                           |         |             |         |             |         |             |
| Total                                                   | 2.605%  | $P = 0.315$ | 4.416%  | $P = 0.314$ | 1.321%  | $P = 0.679$ |
| Aged < 73                                               | 3.724%  | $P = 0.342$ | 5.686%  | $P = 0.408$ | 2.261%  | $P = 0.630$ |
| Aged $\geq$ 73                                          | -0.899% | $P = 0.787$ | -0.149% | $P = 0.977$ | -1.384% | $P = 0.748$ |
| <b>Thrombocytopenia</b>                                 |         |             |         |             |         |             |
| Total                                                   | 7.487%  | $P < 0.001$ | 9.117%  | $P < 0.001$ | 6.439%  | $P = 0.001$ |
| Aged < 73                                               | 5.568%  | $P = 0.008$ | 3.595%  | $P = 0.258$ | 6.839%  | $P = 0.013$ |
| Aged $\geq$ 73                                          | 9.958%  | $P < 0.001$ | 16.216% | $P < 0.001$ | 5.759%  | $P = 0.028$ |

|                            |         |                  |         |                  |         |                  |
|----------------------------|---------|------------------|---------|------------------|---------|------------------|
| <b>Delirium</b>            |         |                  |         |                  |         |                  |
| Total                      | -0.993% | <i>P</i> = 0.588 | 1.638%  | <i>P</i> = 0.534 | -2.602% | <i>P</i> = 0.295 |
| Aged < 73                  | -1.880% | <i>P</i> = 0.454 | -0.753% | <i>P</i> = 0.858 | -2.619% | <i>P</i> = 0.402 |
| Aged ≥ 73                  | -0.004% | <i>P</i> = 0.999 | 3.571%  | <i>P</i> = 0.250 | -2.137% | <i>P</i> = 0.594 |
| <b>IHD</b>                 |         |                  |         |                  |         |                  |
| Total                      | 0.020%  | <i>P</i> = 0.986 | 0.626%  | <i>P</i> = 0.552 | -0.260% | <i>P</i> = 0.884 |
| Aged < 73                  | -0.849% | <i>P</i> = 0.488 | -1.087% | <i>P</i> = 0.451 | -0.661% | <i>P</i> = 0.709 |
| Aged ≥ 73                  | 1.646%  | <i>P</i> = 0.432 | 2.703%  | <i>P</i> = 0.085 | 1.160%  | <i>P</i> = 0.723 |
| <b>CHF</b>                 |         |                  |         |                  |         |                  |
| Total                      | -0.536% | <i>P</i> = 0.674 | 1.381%  | <i>P</i> = 0.480 | -1.752% | <i>P</i> = 0.294 |
| Aged < 73                  | -0.091% | <i>P</i> = 0.946 | -0.251% | <i>P</i> = 0.919 | -0.024% | <i>P</i> = 0.988 |
| Aged ≥ 73                  | -0.483% | <i>P</i> = 0.830 | 3.571%  | <i>P</i> = 0.250 | -3.093% | <i>P</i> = 0.322 |
| <b>Cardiac dysrhythmia</b> |         |                  |         |                  |         |                  |
| Total                      | 0.624%  | <i>P</i> = 0.653 | 3.002%  | <i>P</i> = 0.124 | -0.850% | <i>P</i> = 0.655 |
| Aged < 73                  | -0.137% | <i>P</i> = 0.933 | 1.672%  | <i>P</i> = 0.558 | -1.298% | <i>P</i> = 0.511 |
| Aged ≥ 73                  | 2.058%  | <i>P</i> = 0.378 | 4.488%  | <i>P</i> = 0.096 | 0.611%  | <i>P</i> = 0.858 |

Abbreviation: CHF, congestive heart failure; IHD, ischemic heart disease.

<sup>a</sup>Δ% means the difference of incidence of chemotherapy-associated adverse events (Δ%) between oxaliplatin group and 5-FU group (Δ% = incidence of adverse events in oxaliplatin group minus incidence of adverse events in 5-FU group).
